# 1 A new approach of dissecting genetic effects for complex traits

2 Meng Luo<sup>1\*</sup>, Shiliang Gu<sup>1\*</sup>

3 <sup>1</sup>Jiangsu Provincial Key Laboratory of Plant Functional Genomics of Ministry of Education; Yangzhou University,  
4 Yangzhou, Jiangsu 225009, China.

5 \*Correspondence and requests for materials should be addressed to Meng Luo (email: [czheluo@gmail.com](mailto:czheluo@gmail.com)) or Shiliang  
6 Gu (email: [slgu@yzu.edu.cn](mailto:slgu@yzu.edu.cn)).

7 **Abstract:** During the past decades, genome-wide association studies (GWAS) have been used to  
8 successfully identify tens of thousands of genetic variants associated with complex traits included  
9 in humans, animals, and plants. All common genome-wide association (GWA) methods rely on  
10 population structure correction to avoid false genotype and phenotype associations. However,  
11 population structure correction is a stringent penalization, which also impedes the identification of  
12 real associations. Here, we used recent statistical advances and proposed iterative screen regression  
13 (ISR), which enables simultaneous multiple marker associations and shown to appropriately  
14 correction population stratification and cryptic relatedness in GWAS. Results from analyses of  
15 simulated suggest that the proposed ISR method performed well in terms of power (sensitivity)  
16 versus FDR (False Discovery Rate) and specificity, also less bias (higher accuracy) in effect (PVE)  
17 estimation than the existing multi-loci (mixed) model and the single-locus (mixed) model. We also  
18 show the practicality of our approach by applying it to rice, outbred mice, and *A.thaliana* datasets.  
19 It identified several new causal loci that other methods did not detect. Our ISR provides an  
20 alternative for multi-loci GWAS, and the implementation was computationally efficient, analyzing  
21 large datasets practicable ( $n > 100,000$ ).

22

23

24

25

26

27

28

## 29 **Introduction**

30 Genome-wide association studies (GWASs) have been increasingly prominent in detecting genetic  
31 variants associated with complex traits and disease, while the identified variants significantly  
32 explain only a fraction of total phenotypic variance, resulting in the so-called ‘missing heritability’,  
33 but adventitiously pinpointing biological mechanisms<sup>1,2</sup>. Commonly, the individuals used in GWA  
34 studies are not related to each other, some degrees of confounding cryptic relatedness and  
35 population stratification are inevitable. Simultaneously, there is another confounding existing,  
36 which is the genetic background (non-genetic factor), such that the population structure control  
37 does not do well in very complex cases<sup>3</sup>. If these happen can lead to spurious associations (there is  
38 only correlated with the phenotype and markers, but not substantially associated with causal  
39 variants) between the phenotype and unlinked candidate loci (Mendel’s Second Law)<sup>4,5</sup>, which  
40 brought about the challenge problem that how to efficiently conquer test for associations in the  
41 presence of population structure (including cryptic relatedness and population stratification) and  
42 genetic background.

43 During the past two decades, there are many solutions to the problem of population structure,  
44 including genomic control(GC)<sup>6,7</sup>, structured association (SA)<sup>8-10</sup>, regression control (RC)<sup>11,12</sup>,  
45 principal components adjustment (PCA)<sup>13,14</sup> and mixed regression models(MRM)<sup>15-17</sup>. In the  
46 regression control and principal components adjustment approaches, population structure both are  
47 taken into account by including covariates in the regression model. In the absence of ascertainment  
48 bias, RC performed similarly to GC and SA, while being computationally fast and allowing the  
49 flexibility of the regression framework which including backward (stepwise) selection and  
50 shrinkage penalty approach<sup>12</sup>. Howbeit, with ascertainment bias, the RC approach substantially  
51 outperformed GC<sup>5</sup>. These proposals only perform well in simple cases, however, show poorly when  
52 the population structure is more complex<sup>18</sup>.

53 Incontrovertibly, the current method that linear mixed model (LMM) has extensively used for  
54 GWA studies, having been shown to perform well in humans, plants, and animals<sup>19-21</sup>. The linear  
55 mixed model that included approximate methods P3D<sup>22</sup>, EMMAx<sup>23</sup>, and GRAMMAR-Gamma<sup>24</sup>,  
56 also exact methods EMMA<sup>16</sup>, FaST-LMM<sup>25</sup>, GEMMA<sup>26</sup>, and so forth. It both models the genotype  
57 effect as a random term in a linear mixed model, by explicitly involving a similarity matrix (called  
58 genomic relationship matrix (GRM)<sup>27</sup>) or covariance structure between the individuals, which it  
59 can synchronously correct the population structure and the genetic background. As these mixed-  
60 model methods that perform pretty well, but GWAS power remains limited<sup>28</sup>. On the one hand, it  
61 both are based on single-locus tests, while the most complex traits controlled by several substantial  
62 effects loci and numerous polygenes with minor effects, these univariate linear mixed model

63 approaches may not be adequate, especially in complicated individual relatedness<sup>29</sup>. The inflation  
64 of single-locus association test is expected for complex traits, even in the absence of population  
65 structure<sup>30</sup>. On the other hand, compared with the traditional linkage mapping, by including  
66 multiple cofactors in the genetic model (multiple-loci test) is a prominent alternative and  
67 indisputable, which the main feature is the ability to control genomic background effects. Also, a  
68 multi-loci test of association has shown outperform single-locus analysis of association<sup>31-33</sup>.  
69 However, the main problem in GWAS that the number of subjects,  $n$ , is in the hundreds or  
70 thousands, while  $p$  could be a range of millions of genetic features. Moreover, the number of loci  
71 (gene) exhibiting a detectable association with a trait is minimal. It is a fundamental problem in  
72 high-dimensional variable selection. Several methods have been developed to address these issues,  
73 such as LASSO<sup>34,35</sup>, stepwise regression<sup>36-38</sup>, penalized logistic regression<sup>39</sup> and penalized multiple  
74 regression<sup>40</sup>.

75 For the past decades, based on these methods, where several new multi-locus methodologies  
76 have been developed. For example, MLMM<sup>33</sup>, where stepwise mixed-model regression with  
77 forwarding inclusion and backward elimination, showed the advantage of computationally efficient  
78 and outperform the univariate mixed model for GWAS. LMM-Lasso<sup>41</sup>, where combines the  
79 benefits of established linear mixed models (LMM) with sparse Lasso regression. Some of the  
80 others, BSLMM<sup>42</sup>, MRMLM<sup>43</sup>, and FASTmrEMMA<sup>44</sup>, both are based on the mixed model.  
81 Recently, FarmCPU<sup>28</sup> and QTCAT<sup>45</sup> are not based on a mixed model. However, FarmCPU by  
82 iterating usage of fixed and random effect models, which improved the power and computation  
83 time both than the univariate and multivariate mixed model. QTCAT combining those highly  
84 correlated markers, which cannot be distinguished for their contribution to the phenotype and  
85 enabling simultaneous correction of the population structure and also reflects the polygenic nature  
86 of complex traits better than single-marker methods and outperform traditional linkage mapping.

87 Whereas hypothesis tested, have been changed by the use of a genomic relationship matrix as  
88 the random effect to correct for population structure and infinitesimal genetic background. Where  
89 we focus on test multiple loci to effects the phenotype that is neither explained by population  
90 structure nor by the genetic background<sup>45</sup>. It is problematic that the trait model assumptions to  
91 corroborate in reality, which ultimately leads to failures in identifying causal loci<sup>29,45-47</sup>.

92 Here we introduce a new unique variable selection procedure of regression statistic method, call  
93 Iterative screen regression. We formulated a new regression information criterion (RIC) and used  
94 this criterion as the objective function of the entire variable screen process. We evaluate various  
95 model selection criteria through simulations, which suggest that the proposed ISR method performs

96 well in terms of FDR and power. Finally, we show the usefulness of our approach by applying it to  
97 *A. thaliana* and mouse data.

## 98 **Results**

99 **Method overview.** An overview of our method is provided in the Methods section, with details  
100 provided in the Supplementary Note. Briefly, we offered a new regression statistics method and  
101 combined a unique variable screening procedure (Fig.1).

102 **Simulations.** We first compare the performance of ISR with several other commonly used  
103 association mapping methods using simulations. A total of six different methods are included for  
104 comparison: (1) CMLM<sup>48</sup>; (2) LMM (GEMMA) and LM<sup>26</sup>; (3) MLMM<sup>33</sup>; (4) FarmCPU<sup>28</sup>; (5)  
105 FASTmrEMMA<sup>44</sup>; (6) FaSTLMM<sup>49</sup>; (7) PLINK (Fisher's exact test)<sup>50</sup>.

106 To make our simulations as real as possible, we used genotypes from an existing two model  
107 species (*A. thaliana* and mouse), the previous dataset had been widely used to as simulating data  
108 including all the above comparison methods. GWAS dataset was simulated by adding phenotypic  
109 effects to real genotypic data from *A. thaliana* data under two different scenarios (I, II) ( Methods  
110 section for details): a 10-locus model and a 100-locus model. These scenarios have already been  
111 simulated in previously<sup>33,44</sup>. In scenarios I, the power for each causal SNPs was defined as the  
112 proportion of samples where the causal SNPs were detected (the P-value is smaller than the  
113 designated threshold. See the methods all character, Supplementary Table 1). Where we can see  
114 that with different heritabilities by each casual loci SNPs, such that multi-locus model including  
115 ISR, FASTmrEMMA, FarmCPU outperformed than the mixed model including single-locus(LMM,  
116 CMLM) and multi-locus(MLMM); moreover, ISR detected the small effect by the casual loci own  
117 more power than the others methods, especially the mixed model (GEMMA, MLMM, CMLM)  
118 (Fig.2a), as the following simulation also showed the same phenomena. According to this, all  
119 methods' precision—here defined as the percentage of true positives of all reported loci, where ISR  
120 at a level of 5% Bonferroni correction outperformed than the others methods was 92.41%, 80.77%,  
121 78.48%, 68.20%, 65.92% and 65.58% (Fig.2b), respectively. Although the FASTmrEMMA  
122 detected the most casual loci, the true positive only almost equal ISR methods detected, while the  
123 FDR bigger than ISR nearly 2.8 times. In a word, ISR performs high power and low FDR in the  
124 sample trait than other methods. For the sophisticated trait included, 100 locus model is shown, at  
125 a different level of heritability 0.25 (low), 0.5 (middle), and 0.75 (high), which can be summarized  
126 as follows. First, methods that use a kinship term to correct population structure outperform  
127 comparable methods that do not (FASTmrEMMA, FarmCPU, GEMMA, MLMM, CMLM versus  
128 LM, respectively). Second, the mixed model, including the single-locus and multi-locus model  
129 performed almost equivalent. Third, in low-level heritability, ISR comparable the mixed model



130 (FASTmrEMMA, GEMMA, MLMM, CMLM) and outperformed than FarmCPU and LM. While  
131 in the middle and high-level heritability, the performance of ISR more than FarmCPU and other  
132 methods (Fig.3 and Supplementary Figs.1-2).

133 The first CFW mice dataset simulation (scenarios III). Where the phenotype variation controlled  
134 by 50-locus is shown (Supplementary Figs.3-5), in which at different levels of heritability 0.25  
135 (low), 0.5 (middle), and 0.75 (high) settings can be summarized as follows. On the one hand, ISR  
136 performed well regarding power versus FDR and FPR than other methods. On the other hand, the  
137 multi-locus (mixed) model outperformed than single-locus (mixed) model (ISR, FarmCPU,  
138 MLMM, FASTmrEMMA versus GEMMA, CMLM, LM). Moreover, with the increase of  
139 heritability (0.25~0.75), ISR performs well that get lower FDR, while other methods almost  
140 unchanged (Supplementary Fig.6). The second simulation (scenarios IV), another controlled by the  
141 100-locus model, is shown (Fig.4) but only set a level of heritability was 0.5. The performance of  
142 the used full dataset is the same as random sample data from all genome. On the one hand, ISR also  
143 performed well regarding power versus FDR and FPR than other methods. On the other hand, the  
144 multi-locus (mixed) model outperformed than single-locus (mixed) model (ISR, FarmCPU,  
145 MLMM, FASTmrEMMA versus GEMMA, CMLM, LM). It is indicated that randomly choose the  
146 SNPs from all cover genome (scenarios I-III) or using all genome datasets for simulation, and both  
147 results were identically<sup>33</sup>.

148 The last two simulations (scenarios V(1-2)) using a human dataset derived from PLINK2<sup>50</sup>  
149 (details seeing the Methods section). Compared to the power, ISR had a significantly larger AUC  
150 than FarmCPU, FaSTLMM, and PLINK-Fisher for both TPR versus FDR and TPR versus FPR in  
151 both simulations (Fig.5b). PLINK-Fisher had a smaller AUC than ISR, FarmCPU, and FaSTLMM  
152 for both comparisons. Especially, FarmCPU only had a significantly larger AUC than FaSTLMM  
153 and PLINK-Fisher for TPR versus FDR, not TPR versus FPR in the first simulation (Fig.5b). In  
154 other words, FarmCPU had a similar AUC with FaSTLMM and PLINK-Fisher for controlling FPR  
155 (Type I error). On the other hand, except PLINK-Fisher that other methods detected power higher  
156 along with the samples 10 times increased(1000~10000, Fig.5(a,b)). This situation held true as  
157 above two model species (Arabidopsis and mouse).

158

159 **Estimated Effect (PVE).** Generally, if there are environmental factors that influence the phenotype  
160 and are correlated with genotype (e.g., due to population structure), then these would undoubtedly  
161 affect estimates of SNPs effect, and consequently also affect estimates of other quantities, including  
162 the PVE (the total proportion of variance in phenotype explained, or SNPs heritability)<sup>42,51</sup>. So,  
163 except comparing the detected power, the accuracy of estimated effect (or PVE) also is one of the

164 keys to whether the model performs well or not. Here, we used the root of mean square error (RMSE)  
165 as the accuracy of the PVE estimates obtained by each methods<sup>42</sup>.

166 In the Arabidopsis simulation dataset (scenarios I). The first simulation set (sparse genetic  
167 architecture, which assumes effects are sparse, fixed ten casual SNPs) result showed that ISR,  
168 GEMMA, and CMLM significantly perform more stable and accurate (lower RMSE) than other  
169 methods (Fig.7), which another two methods (FarmCPU, and FASTmrEMMA) presenting  
170 downward bias of PVE estimate. Summarizes the resulting of PVE estimates with six methods.  
171 Apparently, except FarmCPU, multi-loci (mixed) model estimated more accuracy than the single-  
172 locus mixed model (ISR, FASTmrEMMA versus GEMMA, CMLM). Where the single-locus  
173 mixed model is presenting upward bias and tends to decrease along with the PVE (heritability)  
174 increased, whereas compared with FarmCPU that tends to downward bias. Furthermore, ISR and  
175 FASTmrEMMA accuracy tend to lower along with the increase of heritability (Figs.7 and  
176 Supplementary Fig.7). Where the multiple-loci (mixed) model (ISR and FASTmrEMMA) with  
177 lower RMSE estimates of PVE presenting stable and only in the small PVE (low heritability),  
178 which tend to less downward bias, on the other hand, detected large effect loci by all methods  
179 equally well, while ISR and FarmCPU could expand its findings to loci with smaller effect sizes.  
180 Moreover, ISR is more efficient in finding small effect loci along with the increase of heritability  
181 (Figs.6, 7, 8, 9). Human dataset simulation showed the same results, in which ISR had the lowest  
182 RMSE than others did three methods (Fig.9).

183

184 **Applying ISR to real datasets.** To validate and gain further insight ISR, it's along with FarmCPU,  
185 GEMMA, CMLM, MLMM and FASTmrEMMA was used to reanalyze the *A. thaliana* dataset<sup>52</sup>  
186 for all phenotypes related to flowering time and others (Defense-related, Ionomics and  
187 Developmental phenotypes, only chosen one). We excluded phenotypes measured for less than 160  
188 accessions to avoid possible 'small sample size effects, resulting in 13 flowering times phenotypes  
189 that were considered. The relatedness between individuals ranges in a wide spectrum leading to a  
190 complex population structure<sup>53</sup>. The SNPs identified that using six methods is listed in  
191 (Supplementary Table 3). The dataset is characterized by high heritabilities (0.89~1.00), except for  
192 the At1CFU2 trait with relatively low heritability (0.54). Moreover, both were small sample sizes  
193 (147~194).

194 Having shown the accuracy of ISR more than other methods in recovering causal SNPs in  
195 simulation, we now demonstrate that the ISR better models the genotype-to-phenotype map in  
196 Arabidopsis thaliana. ISR methods detected the most SNPs significantly associated close to or in  
197 known candidate genes with the above sixteen traits and significantly more than other methods (see

198 Supplementary Fig.6 and Table 1). Such as, based on the SNPs detected by ISR, 13/13 genes were  
199 previously reported to be associated with the LN10 (leaf number at flowering time,10°C) trait,  
200 while 5/5, 0/0, 0/0, 3/3, and 5/9 genes detected by FarmCPU, GEMMA, CMLM, MLMM, and  
201 FASTmrEMMA, respectively <sup>54,55</sup>. The same as the other traits in Table 1. As corresponding  
202 simulation result showed that ISR has higher detected power and lower false discovery rate than  
203 other methods in different heritabilities, especially, in high heritability. MLMM result indicated  
204 that at the EBIC and mBonf two different model selection criteria, which shown both detected the  
205 same genes.

206 ISR outperformed other methods concerning controlling inflation of P values, identifying new  
207 associated markers, and covering with known loci. We take three phenotypes association test results  
208 in *A.thaliana* dataset as an example. The first is bacterial disease resistance (At1 CFU2) with low  
209 heritability <sup>52</sup>, the second is leaf Na<sup>+</sup> accumulation<sup>56</sup>, and the third is a cellular trait of meristem  
210 zone length<sup>57</sup> both from worldwide *A. thaliana* accessions. The two latter phenotypes have already  
211 been reanalyzed by MLMM and QTCAT two methods, respectively.<sup>45,58</sup>. For the At1 CFU2 trait,  
212 FarmCPU, CMLM, and FASTmrEMMA both slightly under expected (Supplementary Fig.9), and  
213 except FASTmrEMMA identified no associated SNPs above the threshold of 5% after Bonferroni  
214 multiple test correction. MLMM and GEMMA controlled inflation well, while only MLMM  
215 identified one associated SNP above a threshold of 5% after Bonferroni multiple test correction.  
216 Furthermore, ISR not only controlled inflation well but also identified seventeen associated SNPs  
217 above the significance threshold, and only three loci out of the known candidate gene (Table 1,  
218 Supplementary Fig.8).

219 Sodium accumulation in the leaves of *A.thaliana* that had detected strongly associated with  
220 genotype and expression levels of the Na<sup>+</sup> transporter *AtHKT1;1* <sup>56</sup>. Extraordinarily, an SNP located  
221 in the first exon of the gene (chromosome4: 6,392,280) shows a highly significant association using  
222 an approximate mixed model. We reanalyzed the dataset used six different linear models (as above  
223 described). Both methods result indicated that identified the same most significant locus  
224 (chromosome4: 6,392,280), while in our study that detected more than the original research, except  
225 CMLM. The approximate mixed model CMLM showed the same result with<sup>56</sup>. Three methods  
226 CMLM, GEMMA, and FASTmrEMMA show slight inflation, while ISR, MLMM, and FarmCPU  
227 controlled inflation well. The two methods ISR and FarmCPU detected one same locus  
228 (chromosome2: 5,169,035), while ISR detected four loci in chromosome three which as same as  
229 MLMM identified three loci (total three loci) and two loci by FarmCPU (total two loci). Moreover,  
230 both one identified by CMLM (total one loci) and GEMMA (total four loci). ISR detected five loci  
231 in chromosome four which as same as MLMM identified four loci (total five loci) and also

232 FarmCPU four loci (total five loci); ISR detected two loci in chromosome five only as same as  
233 MLMM detected one (total one loci), while between the others methods didn't identify the same  
234 locus (Supplementary Fig.10 and Supplementary Table 4). In others words, except for as same as  
235 others methods detected genes, where it indicated that our model always detected more genes  
236 (Table 1).

237 In a recent GWA study<sup>57</sup>, authors using a worldwide collection of 201 natural Arabidopsis  
238 accessions to study the genetic architecture of root development. They also use the approximate  
239 mixed model and detected only one most significant association (at position 22244990 on  
240 chromosome one, an F-box gene). Natural genetic variation influences the meristem zone lengths  
241 in roots. Here, as above, our reanalyzed result showed that four methods included CMLM,  
242 FarmCPU, GEMMA, and MLMM control inflation well, while no identified association SNPs after  
243 0.05 Bonferroni correction. The FASTmrEMMA showed under deflation, but the final result  
244 detected nine SNPs (Supplementary Fig.11 and Supplementary Table 4). While ISR not only  
245 controls inflation well but also identified fifteen SNPs also included the position 22244990 on  
246 chromosome one and all loci except one both in the candidate gene (Supplementary Fig.11 and  
247 Supplementary Table 4). Otherwise, Two methods ISR and FASTmrEMMA detected the same  
248 most significant association locus in chromosome three (Supplementary Fig.12).

249 Carworth Farms White (CFW) mice are a commercially available outbred mouse population.  
250 The dataset was previously reanalyzed to show the usefulness of the mixed model<sup>59</sup>. Here, we also  
251 reanalyzed the dataset used six different linear models that included a single locus linear model  
252 (CMLM and GEMMA) and multiple loci linear models (ISR, MLMM, FarmCPU, and  
253 FASTmrEMMA). Compared with the results that SNPs identified by six methods all were listed in  
254 (Supplementary Table.5). We also calculated a significance threshold via permutation, which is a  
255 standard approach for QTL mapping in mice that controls the type I error rate well (Supplementary  
256 Fig.13). We mapped QTLs for ten behavioral and physiological phenotypes, and mapping  
257 association results indicated that SNPs detected on different chromosomes by the single locus  
258 mixed model (GEMMA and CMLM) and associated by multiple loci linear model (ISR), while  
259 except the MLMM, FarmCPU, and FASTmrEMMA methods. Moreover, where the ISR always  
260 detected additional significate association locus. The results are mostly consistent with the  
261 simulations investigated. For example, QTL mapping for abnormal BMD phenotype that single-  
262 locus mixed model (GEMMA and CMLM) identifies two sharp peaks of significantly associated  
263 SNPs on chromosome five and eleven, and the most significant associated two loci were  
264 rs27024162 and rs32012436 (Supplementary Fig.14). Except for FarmCPU and FASTmrEMMA,  
265 those loci are both detected by multiple loci linear (mixed) model (ISR and MLMM) methods.

266 Moreover, in contrast to that ISR, the visualization of Manhattan and QQ (Q stand for Quantile)  
267 plot showed that the ISR model fits more stable and control the population structure well than  
268 others (Supplementary Fig.14). Considering the lower error rates of ISR, those result promises to  
269 reveal genes that so far could not have been identified and more generally again shows the vast  
270 potential of ISR including its applicability to others species.

271 We further applied ISR to reanalyzed the rice dataset of grain length trait that owns a strong  
272 population structure, which the germplasm collections from all around the world<sup>60</sup>. After processing  
273 the data, including filtering for missing data, minor allele frequencies(MAF <0.05), the data were  
274 composed of  $m = 464,831$  SNPs and  $n = 1,132$  individuals. The data was previously reanalyzed to  
275 show the usefulness of the mixed model(EMMAX method<sup>61</sup>). Moreover, we used the same settings  
276 for mixed-model estimation here. We use the significance threshold level of 0.05 Bonferroni  
277 correction ( $P < 1.08E-07$ ) for comparative purposes and the significant SNPs for grain length trait  
278 identified by ISR and the others seven methods(except all above mentioned, also including the  
279 EMMAX<sup>61</sup> and FASTLMM<sup>49</sup> methods) are listed in (Supplementary Table.6). Here, all samples  
280 were evaluated together, and we can see two major GWAS peaks associated with grain length, one  
281 on chromosome 3 and one on chromosome 5 detected by the single-locus mixed model including  
282 GEMMA, EMMAX, FASTLMM, and CMLM methods. However, only the FASTLMM identified  
283 more than four SNPs in chromosome 10 (one) and 12 (three). The most significant SNPs were  
284 SNP-3.16732086 and SNP-5.5371749 from each of the major peaks on chromosomes 3 and 5,  
285 except for FASTmrEMMA, both identified by other methods (Supplementary Fig.15). Compared  
286 with the top ten SNPs detected by ISR, both different detected the same by GEMMA (two),  
287 EMMAX (two), FASTLMM (three), CMLM (two), FarmCPU (six), MLMM (four), and  
288 FASTmrEMMA (two).

289

## 290 Discussion

291 Over the recent years, the prestigious GWAS methods development has been through several  
292 milestones from the single-locus model (mainly was a mixed model, such as EMMA<sup>16</sup>) to the multi-  
293 loci model (recently, BLINK<sup>62</sup>). Improvement of the LMM-based association approach has been  
294 proposed (included single-locus and multiple-loci linear model)<sup>48,49,58,61,63</sup>. All improvements are  
295 based on the assumption that population structure correction along with its negative effects cannot  
296 be entirely avoided (Supplementary Table 5, 6, and Supplementary Figs. 14, 15), part of the reasons  
297 that the trait is not approximately following an infinitesimal genetic architecture<sup>63</sup>. Otherwise,  
298 population structure leads to linkage disequilibrium (LD) between physically unlinked regions and

299 thereby to correlations between markers of these regions. However, the multiple-loci linear model  
300 can conquer LD (Supplementary Fig.12b). The problem of population structure in GWAS is best  
301 viewed as one of model misspecification. Single-locus tests of the association are the wrong model  
302 to use when the trait is not attributable to a single locus.

303 Here, we have presented a novel statistical regression model. Based on that, derive a new set of  
304 methodologies, called a ‘multiple-locus linear model’ (ISR), and using it to the genetic association  
305 of complex traits. The method includes a significant locus in the model via a new iterative screen  
306 regression approach, which was continually changing the variable select criterion of the model at  
307 each step. ISR is a combined method with two stages, each of which needs a critical p-value. In the  
308 first step, a critical p-value 0.01 (methods default) (or 0.005 and 0.001, Supplementary Note Fig.2)  
309 were compared to obtain the best one. We divided variants into three types (Supplementary Note  
310 Fig.5 and Fig.1) and combined the expansion and contract screen procedure (Fig.1). Population  
311 structure is not species-specific but can be found in populations of any type. Moreover, we want to  
312 point out that the formulation of ISR can also be easily extended to accommodate other fixed effects  
313 (e.g., age, sex, or genotype principal components) that can be used to account for sample non-  
314 independence due to other genetic or shared environmental factors and similar to the LMM or LM  
315 approach. Otherwise, add fixed effects had no influenced the detected power (Supplementary  
316 Fig.17). ISR without fitting PCs as covariates still outperformed MLM that incorporated PCs as  
317 covariates (Supplement Fig.15). Fitting appropriate PCs as covariates in ISR further improved  
318 statistical power (Supplement Fig.17).

319 Our simulations showed that ISR is still very conservative, which indicates that such further  
320 development could lead to even more powerful methods. However, already in the current form,  
321 ISR correctly accounted for polygenic inheritance and facilitated to overcome the requirement for  
322 population structure correction. In any way, independent of the actual method, associating  
323 correlated markers will always be superior to the single-marker association. They are more  
324 consistent with the nature of quantitative traits (Supplementary Fig.15). ISR demonstrated that not  
325 only promising performance regarding power versus FDR and FPR in comparison with a single-  
326 locus mixed model scan (CMLM<sup>22</sup>, GEMMA<sup>26</sup>, FaSTLMM, and PLINK-Fisher) and multiple loci  
327 mixed model scan (FarmCPU<sup>28</sup>, MLM<sup>58</sup>, and FASTmrEMMA<sup>44</sup>) but also had a higher accuracy  
328 effect estimated (PVE estimated). Particularly applying a relative conservative threshold, which  
329 can be effectuated with one of the proposed model quality criteria. ISR is not without its limitations.  
330 Perhaps the most significant burden is its computational cost. However, it still comparable with  
331 MLM, CMLM, and faster than FASTmrEMMA (Supplementary Fig.19), when the individuals  
332 are a significant increase. On the other hand, it was built by MATLAB language, as we were known,



333 which the M language with lower computer speed than other languages, such as, C and C++ and  
334 so forth, consider ISR itself, though both R and C++ program under development. Also, we will  
335 consider it combined with other technology like QTCAT<sup>45</sup> to improve the power and achieve a  
336 lower false discovery rate.

337 We have focused on one application of ISR— genetic association of phenotypes. We were  
338 applying ISR to real data from *A. thaliana*, rice, and mice. Compared with other methods, our  
339 methods detected more known and unknown candidate genes (Supplementary Table 3), moreover,  
340 in contrast to the single-locus model that the visualization of the multiple-loci model (ISR,  
341 FarmCPU, and MLM) results which the Manhattan plot and QQ plot showed reasonably and  
342 better illustrates the nature of quantitative traits (Supplementary Fig.15). Being with the marker  
343 density is multiply increasing, and no longer exist spikes and surprising<sup>28</sup>.

344

## 345 **Methods**

### 346 **Overview of ISR.**

347 We provide a brief overview of ISR here. Detailed methods and algorithms are provided in the  
348 Supplementary Note. To model the relationship between phenotypes and genotypes, we consider  
349 the following multiple regression model:

$$350 \quad y = W\alpha + X\beta + \varepsilon, \varepsilon \sim \text{MVN}(0, \delta_e^2 I_n)$$

351 where  $y$  is an  $n$ -vector of phenotypes measured on  $n$  individuals;  $W=(w_1, w_2 \dots w_c)$  is an  $n$   
352 by  $c$  matrix of covariates (fixed effects) including a column of ones for the intercept term;  
353  $\alpha$  is a  $c$ -vector of coefficients;  $X$  is an  $n$  by  $p$  matrix of genotypes;  $\beta$  is the corresponding  
354  $p$ -vector of effect sizes;  $\varepsilon$  is an  $n$ -vector of residual errors where each element is assumed  
355 to be independently and identically distributed from a normal distribution with variance  $\delta_e^2$ ;  
356  $I_n$  is an  $n$  by  $n$  identity matrix and MVN denotes multivariate normal distribution.

357 We used the proposed repeatedly screening stepwise linear regression model—effect size estimates  
358 obtained by the least-square method (LSM) and F-test P values for each SNP. The SNP with the  
359 most significant association is then added to the model as a cofactor for the next step. Combined  
360 the proposed repeatedly screening stepwise regression process, which makes it useful when  $p \gg n$   
361 (when the number of SNPs is much greater than the number of individuals).

362 We also proposed a new model selection criteria (RIC Fig.1) to select the most appropriate  
363 model (Supplementary Note). Without using the classic Bayesian information criterion



364 (BIC)<sup>64</sup> or Akaike information criterion (AIC)<sup>65</sup>, because they are too tolerant in the context  
365 of GWAS<sup>58</sup>, allowing for too many loci in the model.

### 366 **Simulations.**

367 GWA data from a set of 214,051 single-nucleotide polymorphism markers which surveys 248,584  
368 SNPs after quality control, where were genotyped for 1,307 diverse Arabidopsis accessions  
369 showing strong population structure<sup>66</sup> were used to perform two simulation experiments. Also,  
370 another outbred CFW (Carworth Farms White) mice population that including a set of 92,734  
371 single-nucleotide polymorphism markers which were genotyped 1,161 individuals were also used  
372 to perform two simulation experiments. The human dataset derived from PLINK2<sup>50</sup> included two  
373 real human genotype datasets. The first dataset included 1000 samples and 100000 makers (SNPs);  
374 The second included 10000 samples(6000 cases and 4000 control) and 88058 markers(SNPs), and  
375 only included in 19, 20, 21, and 22 chromosomes. The purpose was to compare ISR with the single-  
376 locus model methods (CMLM, GEMMA, LM) and the multi-locus model method (FarmCPU,  
377 FASTmrEMMA, MLM). While for the human dataset, we only compare with FarmCPU,  
378 FaSTLMM<sup>49</sup>, and PLINK(version 1.9, and using Fisher's exact test for association)<sup>50,67</sup>.  
379 For the Arabidopsis dataset, the first two simulation experiments, a set of 20,000 SNPs and 1307  
380 individuals were randomly sampled from the full dataset, seeing the density plot of SNPs  
381 (Supplementary Fig.20).

382 **Scenario I:** For the simple traits, following <sup>44,46,68</sup>, we fixed two randomly chosen causal SNPs from  
383 each chromosome that were used to generate 100 phenotypes, where the phenotypes are simulated  
384 by the simple additive genetic model as following:

$$385 \quad y_j = \mu + \sum_{i=1}^{10} X_i b_i + \varepsilon, \varepsilon \sim MVN_n(0, \sigma_g^2(1 - h^2 / h^2)), j = 1, 2, \dots, 1307$$

386 Where the average  $\mu$  and heritability (total proportion of phenotypic variation explained)  $h^2$  were  
387 set at 10 and 0.25, respectively. The  $\sigma_g^2$  is the empirical variance of  $X_i \beta_i (i = 1, 2, \dots, 10)$  and effects  
388  $\beta_i (i = 1, 2, \dots, 10)$  were generated from a normal distribution with means is 0 and variance is 4, where  
389 effects were 2.2386, -1.6089, 1.4445, -1.3338, -1.8779, 1.6808, -1.0891, 2.4238, 2.1443 and 1.8481,  
390 respectively (supplementary table1).

391 **Scenario II:** For the complex traits, following <sup>33</sup>, we used an additive model with 100 randomly  
392 sampled causal SNPs having effect sizes  $\beta_i (i = 1, 2, \dots, 100)$  drawn from an exponential distribution  
393 with a rate of 1. An additional random deviation  $\mathcal{E}$  was added, drawn from a normal distribution  
394 with a mean of zero and scaled identity matrix as a covariance matrix to fix the trait heritability  $h^2$

395 to 0.25, 0.5, and 0.75. For each phenotypic heritability, 100 phenotypes were simulated, the model  
396 as follows:

$$397 \quad y_j = \sum_{i=1}^{100} X_i b_i + \varepsilon, \varepsilon \sim MVN_n(0, \sigma_g^2(1 - h^2 / h^2)), j=1, 2, \dots, 1307$$

398  
399 For the outbred CFW mice dataset, the first two simulation experiments, a set of 20,000 SNPs and  
400 1161 individuals, were randomly sampled from the full dataset, seeing the density of SNPs  
401 (Supplementary Fig.21).

402 **Scenario III:** The first 100 phenotypes including 50 markers were randomly selected as causal loci.  
403 We assigned an additive effect randomly drawn from a standard normal distribution and added a  
404 random environmental term, such that  $h^2$  of the simulated traits was 0.25, 0.5, 0.75. Where the  
405 additive genetic model simulates the phenotypes as following:

$$406 \quad y_j = \sum_{i=1}^{50} X_i b_i + \varepsilon, \varepsilon \sim MVN_n(0, \sigma_g^2(1 - h^2 / h^2)), j=1, 2, \dots, 1161$$

407 **Scenario IV:** The second 100 phenotypes used all CFW mice dataset that including 100 markers  
408 were randomly selected as causal loci, respectively. We also assigned an additive effect randomly  
409 drawn from a standard normal distribution and added a random environmental term, where the  $h^2$   
410 of the simulated traits only was 0.5, here.

$$411 \quad y_j = \sum_{i=1}^{100} X_i b_i + \varepsilon, \varepsilon \sim MVN_n(0, \sigma_g^2(1 - h^2 / h^2)), j=1, 2, \dots, 1161.$$

412 **Scenario V:** two 100 phenotypes used human dataset<sup>50</sup> that including 100 markers were randomly  
413 selected as causal loci, respectively. We also assigned an additive effect randomly drawn from a  
414 standard normal distribution and added a random environmental term, where the  $h^2$  of the  
415 simulated traits only was 0.5, here.

$$416 \quad y_j = \sum_{i=1}^{100} X_i b_i + \varepsilon, \varepsilon \sim MVN_n(0, \sigma_g^2(1 - h^2 / h^2)), j=1, 2, \dots, 1000$$

$$y_j = \sum_{i=1}^{100} X_i b_i + \varepsilon, \varepsilon \sim MVN_n(0, \sigma_g^2(1 - h^2 / h^2)), j=1, 2, \dots, 10000$$

#### 417 **Receiver operating characteristics.**

418 For each scenario, we examined statistical power (TPR, True Positive Rate) under different levels  
419 of FDR and FPR (Type I error). We defined FDR as the proportion of false positives among the  
420 total number of positives identified. Defined FPR as the proportion of false positives among the  
421 total number of negatives identified. Described the relationship between TPR and FDR or FPR uses  
422 the receiver operating characteristic (ROC) curves<sup>69</sup>. The method with a larger area under the curve  
423 (AUC) is preferred over the method with a smaller AUC.

424 **Other methods.**

425 We compared the performance of ISR mainly with six existing methods: (1) CLMM<sup>22</sup> as  
426 implemented in the GAPIT<sup>70</sup> R package; (2) LMM<sup>66</sup> and LM as implemented in the GEMMA  
427 software (version 0.95alpha); (3) FarmCPU<sup>28</sup> as implemented in the FarmCPU R package; (4)  
428 FASTmrEMMA as implemented in the mrMLM R package; (5) MLMM<sup>33</sup> as implemented in the  
429 MLMM R package. We used default settings to fit all these methods and the details, as above stated.

430

431 **Code availability.**

432 ISR is available as an open-source MATLAB package at <https://github.com/czheluo/ISR>.

433

434 **Data availability**

435 No data were generated in the present study. The 1,307 diverse Arabidopsis accessions data  
436 included genotype and phenotype is publicly available at <https://1001genomes.org/data-center.html>  
437 or <http://bergelson.uchicago.edu/>. The outbred CFW mice of genotype and phenotype data are  
438 publicly available at <https://github.com/pcarbo/cfw>. The human dataset derived from PLINK2<sup>50</sup>  
439 included two real human genotype datasets only for the simulations.

440

441 **Author contributions**

442 Shiliang Gu conceived the study and supervised statistical aspects of this work. Shiliang Gu and  
443 Meng Luo developed the software. Meng Luo designed the experiment and performed the  
444 simulations and data analyses. Meng Luo wrote the manuscript, and Shiliang Gu approved the final  
445 manuscript.

446

447 **Competing interests**

448 The authors declare no competing interests.

449

450 **Additional information**

451 Supplementary Information accompanies this paper.

452

453

454

455

456

457 **References**

- 458 1. Visscher, P.M. *et al.* 10 Years of GWAS Discovery: Biology, Function, and Translation. *The*  
459 *American Journal of Human Genetics* **101**, 5-22 (2017).
- 460 2. Visscher, Peter M., Brown, Matthew A., McCarthy, Mark I. & Yang, J. Five Years of GWAS  
461 Discovery. *The American Journal of Human Genetics* **90**, 7-24 (2012).
- 462 3. Vilhjalmsón, B.J. & Nordborg, M. The nature of confounding in genome-wide association  
463 studies. *Nat Rev Genet* **14**, 1-2 (2013).
- 464 4. Pritchard, J.K. & Rosenberg, N.A. Use of Unlinked Genetic Markers to Detect Population  
465 Stratification in Association Studies. *The American Journal of Human Genetics* **65**, 220-228  
466 (1999).
- 467 5. Astle, W. & Balding, D.J. Population Structure and Cryptic Relatedness in Genetic  
468 Association Studies. *Statistical Science* **24**, 451-471 (2009).
- 469 6. Devlin, B. & Roeder, K. Genomic Control for Association Studies. *Biometrics* **55**, 997-1004  
470 (1999).
- 471 7. Zheng, G., Freidlin, B. & Gastwirth, J.L. Robust Genomic Control for Association Studies.  
472 *The American Journal of Human Genetics* **78**, 350-356 (2006).
- 473 8. Patterson, N., Price, A.L. & Reich, D. Population Structure and Eigenanalysis. *PLOS*  
474 *Genetics* **2**, e190 (2006).
- 475 9. Pritchard, J.K., Stephens, M. & Donnelly, P. Inference of Population Structure Using  
476 Multilocus Genotype Data. *Genetics* **155**, 945 (2000).
- 477 10. Raj, A., Stephens, M. & Pritchard, J.K. fastSTRUCTURE: Variational Inference of Population  
478 Structure in Large SNP Data Sets. *Genetics* **197**, 573 (2014).
- 479 11. Wang, Y., Localio, R. & Rebbeck, T.R. Bias Correction with a Single Null Marker for  
480 Population Stratification in Candidate Gene Association Studies. *Human Heredity* **59**, 165-  
481 175 (2005).
- 482 12. Setakis, E., Stirnadel, H. & Balding, D.J. Logistic regression protects against population  
483 structure in genetic association studies. *Genome Research* **16**, 290-296 (2006).
- 484 13. Price, A.L. *et al.* Principal components analysis corrects for stratification in genome-wide  
485 association studies. *Nat Genet* **38**(2006).
- 486 14. Zhang, S., Zhu, X. & Zhao, H. On a semiparametric test to detect associations between  
487 quantitative traits and candidate genes using unrelated individuals. *Genetic Epidemiology*  
488 **24**, 44-56 (2003).
- 489 15. Yu, J. *et al.* A unified mixed-model method for association mapping that accounts for  
490 multiple levels of relatedness. *Nat Genet* **38**, 203-208 (2006).
- 491 16. Kang, H.M. *et al.* Efficient Control of Population Structure in Model Organism Association  
492 Mapping. *Genetics* **178**, 1709 (2008).
- 493 17. Price, A.L., Zaitlen, N.A., Reich, D. & Patterson, N. New approaches to population  
494 stratification in genome-wide association studies. *Nat Rev Genet* **11**, 459-463 (2010).
- 495 18. Zhao, K. *et al.* An Arabidopsis example of association mapping in structured samples. *PLOS*  
496 *Genet* **3**(2007).
- 497 19. Speliotes, E.K. *et al.* Association analyses of 249,796 individuals reveal eighteen new  
498 loci associated with body mass index. *Nature Genetics* **42**, 937-48 (2010).
- 499 20. Fuchsberger, C. *et al.* The genetic architecture of type 2 diabetes. *Nature* **536**, 41 (2016).
- 500 21. Ramu, P. *et al.* Cassava haplotype map highlights fixation of deleterious mutations during  
501 clonal propagation. *Nature Genetics* **49**, 959-963 (2017).
- 502 22. Zhang, Z. *et al.* Mixed linear model approach adapted for genome-wide association  
503 studies. *Nat Genet* **42**, 355-360 (2010).

- 504 23. Kang, H.M. *et al.* Variance component model to account for sample structure in genome-  
505 wide association studies. *Nat Genet* **42**, 348-354 (2010).
- 506 24. Svishcheva, G.R., Axenovich, T.I., Belonogova, N.M., van Duijn, C.M. & Aulchenko, Y.S.  
507 Rapid variance components-based method for whole-genome association analysis. *Nat*  
508 *Genet* **44**, 1166-1170 (2012).
- 509 25. Lippert, C. *et al.* FaST linear mixed models for genome-wide association studies. *Nat Meth*  
510 **8**, 833-835 (2011).
- 511 26. Zhou, X. & Stephens, M. Genome-wide efficient mixed-model analysis for association  
512 studies. *Nat Genet* **44**, 821-824 (2012).
- 513 27. VanRaden, P.M. Efficient Methods to Compute Genomic Predictions. *Journal of Dairy*  
514 *Science* **91**, 4414-4423 (2008).
- 515 28. Liu, X., Huang, M., Fan, B., Buckler, E.S. & Zhang, Z. Iterative Usage of Fixed and Random  
516 Effect Models for Powerful and Efficient Genome-Wide Association Studies. *PLOS*  
517 *Genetics* **12**, e1005767 (2016).
- 518 29. Atwell, S. *et al.* Genome-wide association study of 107 phenotypes in *Arabidopsis thaliana*  
519 inbred lines. *Nature* **465**, 627-631 (2010).
- 520 30. Yang, J. *et al.* Genomic inflation factors under polygenic inheritance. *European Journal of*  
521 *Human Genetics Ejhg* **19**, 807-12 (2011).
- 522 31. Kao, C.-H., Zeng, Z.-B. & Teasdale, R.D. Multiple Interval Mapping for Quantitative Trait  
523 Loci. *Genetics* **152**, 1203 (1999).
- 524 32. Wang, S.-B. *et al.* Mapping small-effect and linked quantitative trait loci for complex traits  
525 in backcross or DH populations via a multi-locus GWAS methodology. **6**, 29951 (2016).
- 526 33. Segura, V. *et al.* An efficient multi-locus mixed-model approach for genome-wide  
527 association studies in structured populations. *Nat Genet* **44**, 825-830 (2012).
- 528 34. Tibshirani, R.J. Regression shrinkage and selection via the LASSO. *J R Stat Soc B. Journal of*  
529 *the Royal Statistical Society* **58**, 267-288 (1996).
- 530 35. Li, J., Das, K., Fu, G., Li, R. & Wu, R. The Bayesian lasso for genome-wide association studies.  
531 *Bioinformatics* **27**, 516-523 (2011).
- 532 36. Knüppel, S. *et al.* Multi-locus stepwise regression: a haplotype-based algorithm for finding  
533 genetic associations applied to atopic dermatitis. *BMC Medical Genetics* **13**, 8 (2012).
- 534 37. Hwang, J.-S. & Hu, T.-H. A stepwise regression algorithm for high-dimensional variable  
535 selection. *Journal of Statistical Computation and Simulation* **85**, 1793-1806 (2015).
- 536 38. Cordell, H.J. & Clayton, D.G. A Unified Stepwise Regression Procedure for Evaluating the  
537 Relative Effects of Polymorphisms within a Gene Using Case/Control or Family Data:  
538 Application to HLA in Type 1 Diabetes. *The American Journal of Human Genetics* **70**, 124-  
539 141 (2002).
- 540 39. Ayers, K.L. & Cordell, H.J. SNP Selection in genome-wide and candidate gene studies via  
541 penalized logistic regression. *Genetic Epidemiology* **34**, 879-891 (2010).
- 542 40. Hoffman, G.E., Logsdon, B.A. & Mezey, J.G. PUMA: A Unified Framework for Penalized  
543 Multiple Regression Analysis of GWAS Data. *PLOS Computational Biology* **9**, e1003101  
544 (2013).
- 545 41. Rakitsch, B., Lippert, C., Stegle, O. & Borgwardt, K. A Lasso multi-marker mixed model for  
546 association mapping with population structure correction. *Bioinformatics* **29**, 206-214  
547 (2013).
- 548 42. Zhou, X., Carbonetto, P. & Stephens, M. Polygenic Modeling with Bayesian Sparse Linear  
549 Mixed Models. *PLOS Genetics* **9**, e1003264 (2013).
- 550 43. Wang, S.B. *et al.* Improving power and accuracy of genome-wide association studies via a  
551 multi-locus mixed linear model methodology. *Sci Rep* **6**, 19444 (2016).

- 552 44. Wen, Y.J. *et al.* Methodological implementation of mixed linear models in multi-locus  
553 genome-wide association studies. *Brief Bioinform* (2017).
- 554 45. Klasen, J.R. *et al.* A multi-marker association method for genome-wide association studies  
555 without the need for population structure correction. **7**, 13299 (2016).
- 556 46. Yang, J., Zaitlen, N.A., Goddard, M.E., Visscher, P.M. & Price, A.L. Advantages and pitfalls  
557 in the application of mixed-model association methods. *Nat Genet* **46**, 100-106 (2014).
- 558 47. Song, M., Hao, W. & Storey, J.D. Testing for genetic associations in arbitrarily structured  
559 populations. *Nat Genet* **47**, 550-554 (2015).
- 560 48. Zhang, Z. *et al.* Mixed linear model approach adapted for genome-wide association  
561 studies. *Nat Genet* **42**(2010).
- 562 49. Lippert, C. *et al.* FaST linear mixed models for genome-wide association studies. *Nature*  
563 *Methods* **8**, 833 (2011).
- 564 50. Chang, C.C. *et al.* Second-generation PLINK: rising to the challenge of larger and richer  
565 datasets. *GigaScience* **4**, 7 (2015).
- 566 51. Yang, J. *et al.* Common SNPs explain a large proportion of the heritability for human height.  
567 *Nat Genet* **42**(2010).
- 568 52. Atwell, S. *et al.* Genome-wide association study of 107 phenotypes in *Arabidopsis thaliana*  
569 inbred lines. *Nature* **465**(2010).
- 570 53. Platt, A. *et al.* The Scale of Population Structure in *Arabidopsis thaliana*. *PLOS Genetics* **6**,  
571 e1000843 (2010).
- 572 54. Schmid, M. *et al.* A gene expression map of *Arabidopsis thaliana* development. *Nat Genet*  
573 **37**, 501-506 (2005).
- 574 55. Wang, Y. *et al.* Transcriptome Analyses Show Changes in Gene Expression to Accompany  
575 Pollen Germination and Tube Growth in *Arabidopsis*. *Plant Physiology* **148**, 1201 (2008).
- 576 56. Baxter, I. *et al.* A Coastal Cline in Sodium Accumulation in *Arabidopsis thaliana* Is Driven  
577 by Natural Variation of the Sodium Transporter *AtHKT1;1*. *PLOS Genetics* **6**, e1001193  
578 (2010).
- 579 57. Meijon, M., Satbhai, S.B., Tsuchimatsu, T. & Busch, W. Genome-wide association study  
580 using cellular traits identifies a new regulator of root development in *Arabidopsis*. *Nat*  
581 *Genet* **46**, 77-81 (2014).
- 582 58. Segura, V. *et al.* An efficient multi-locus mixed-model approach for genome-wide  
583 association studies in structured populations. *Nat Genet* **44**(2012).
- 584 59. Parker, C.C. *et al.* Genome-wide association study of behavioral, physiological and gene  
585 expression traits in outbred CFW mice. *Nat Genet* **48**, 919-926 (2016).
- 586 60. McCouch, S.R. *et al.* Open access resources for genome-wide association mapping in rice.  
587 *Nature Communications* **7**, 10532 (2016).
- 588 61. Kang, H.M. *et al.* Variance component model to account for sample structure in genome-  
589 wide association studies. *Nature Genetics* **42**, 348 (2010).
- 590 62. Huang, M., Liu, X., Zhou, Y., Summers, R.M. & Zhang, Z. BLINK: A Package for Next Level  
591 of Genome Wide Association Studies with Both Individuals and Markers in Millions.  
592 *bioRxiv* (2017).
- 593 63. Loh, P.-R. *et al.* Efficient Bayesian mixed-model analysis increases association power in  
594 large cohorts. *Nature Genetics* **47**, 284 (2015).
- 595 64. Schwarz, G. Estimating the Dimension of a Model. *Ann. Statist.* **6**, 461-464 (1978).
- 596 65. Akaike, H. Information Theory and an Extension of the Maximum Likelihood Principle. in  
597 *Selected Papers of Hirotugu Akaike* (eds. Parzen, E., Tanabe, K. & Kitagawa, G.) 199-213  
598 (Springer New York, New York, NY, 1998).



- 599 66. Horton, M.W. *et al.* Genome-wide patterns of genetic variation in worldwide *Arabidopsis*  
600 *thaliana* accessions from the RegMap panel. *Nat Genet* **44**, 212-216 (2012).
- 601 67. Purcell, S. *et al.* PLINK: A Tool Set for Whole-Genome Association and Population-Based  
602 Linkage Analyses. *The American Journal of Human Genetics* **81**, 559-575.
- 603 68. Yang, J., Lee, S.H., Goddard, M.E. & Visscher, P.M. GCTA: A Tool for Genome-wide  
604 Complex Trait Analysis. *The American Journal of Human Genetics* **88**, 76-82 (2011).
- 605 69. Fawcett, T. An introduction to ROC analysis. *Pattern Recognition Letters* **27**, 861-874  
606 (2006).
- 607 70. Lipka, A.E. *et al.* GAPIT: genome association and prediction integrated tool. *Bioinformatics*  
608 **28**, 2397-2399 (2012).
- 609 71. Cumming, G., Fidler, F. & Vaux, D.L. Error bars in experimental biology. *The Journal of Cell*  
610 *Biology* **177**, 7 (2007).

611

612

613

614

615

616

617

618

619

620

621

622

623

624

625

626

627

628

629

630



631

632

633

634

635

636

637

638

639

640

641

642

643

644

645

646

647

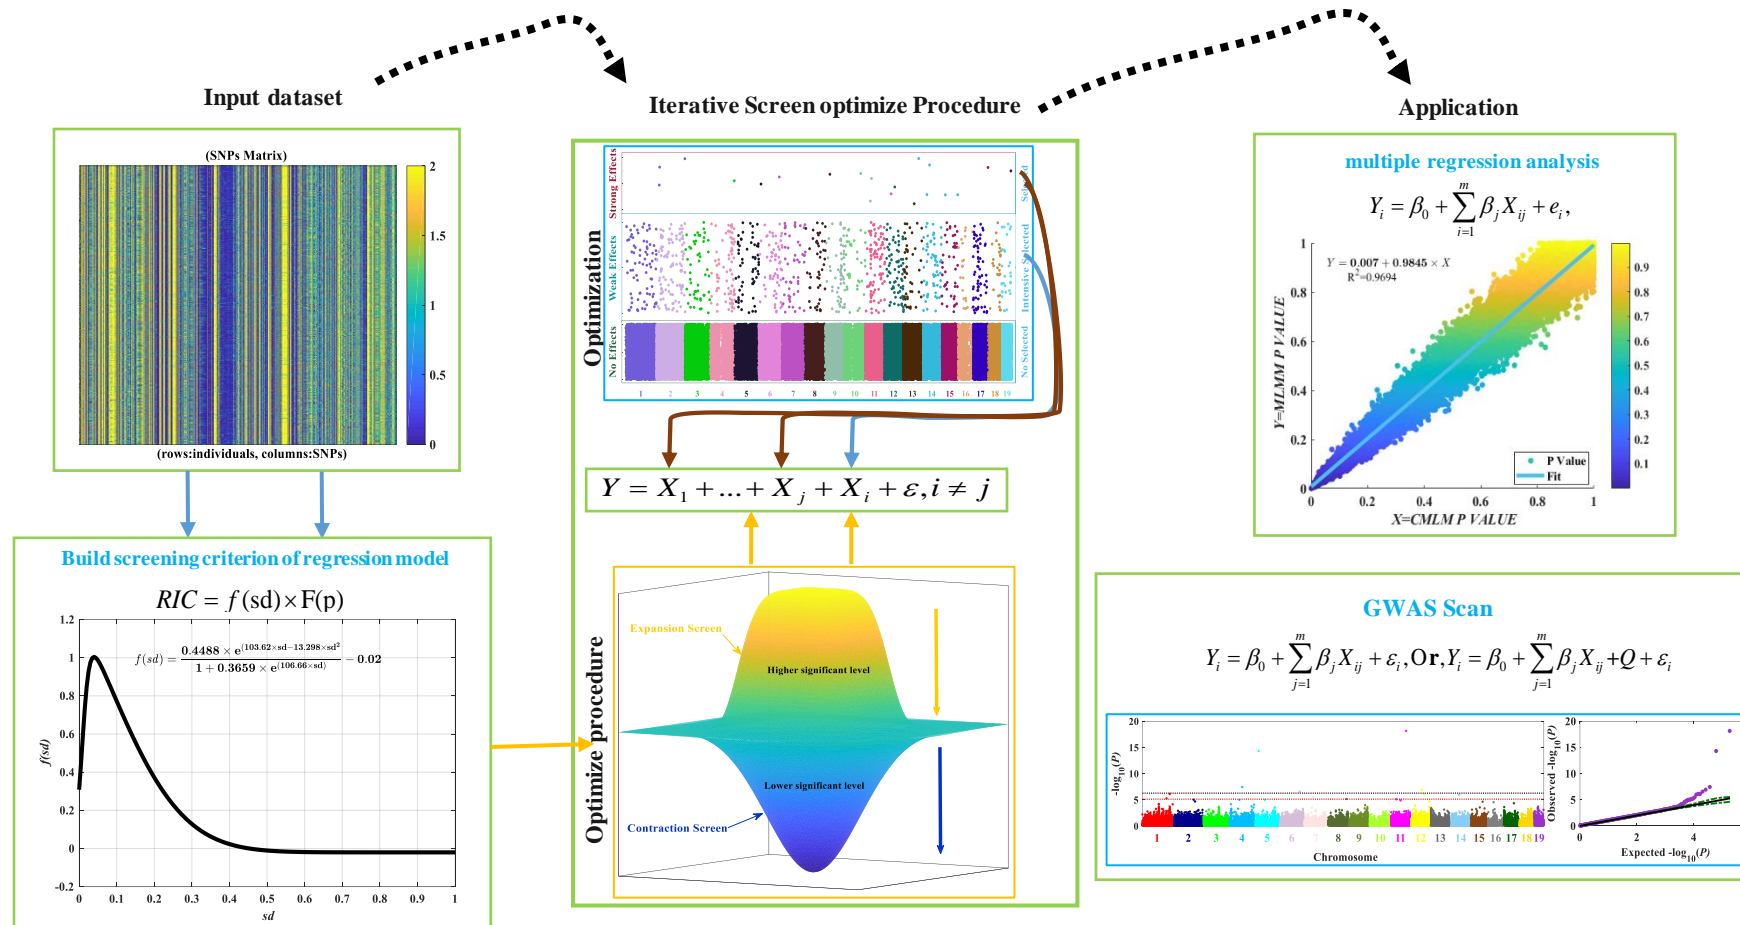

648 **Fig. 1 Schematic overview of model-based is repeatedly screening stepwise regression for GWAS.** The first input dataset with markers (SNPs) matrix representing individual  
649 genotypes (rows) of a population with alleles (0, 2, and 1, missing genotypes will be replaced by the mean genotype or imputed by others complicate algorithm) per marker  
650 (columns). Secondly, we formulated a regression information criterion (RIC, objective function) as the screening criterion of the regression model. Combined, the repeatedly  
651 proposed screen optimizes the procedure, which mainly included expansion screen and contraction select two-steps (Supplementary Note). The third, apply it to multiple  
652 regression analysis and genome-wide association study scan.

653

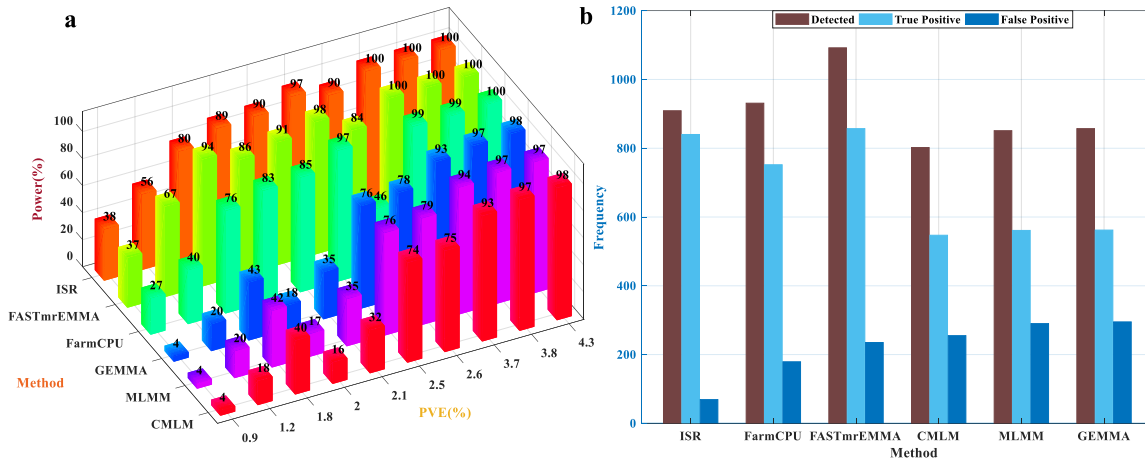

654

655 **Fig. 2 Comparison of ISR with the single-locus and multi-locus approaches.** (a) The detected power in a  
 656 different proportion of phenotypic variation explained (PVE) by genotyped SNPs (10 casual loci) and without  
 657 considered the window size (means, the 0kb window size) and 100 replicates. (b) Compared the number of  
 658 detected, true positive and false positive, also the FDR in the different genetic models.

659

660

661

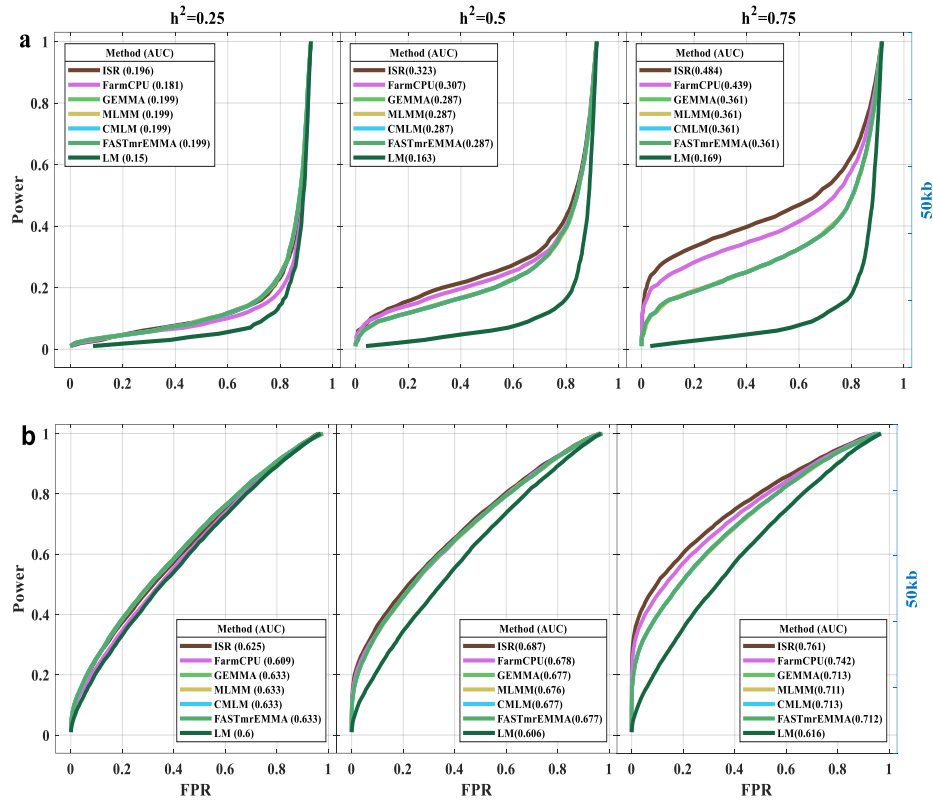

662

663 **Fig.3 Performances of TPR (Power) versus FDR and FPR in Arabidopsis dataset.** A receiver operating  
 664 characteristic curve for seven methods were performed to test Power/FDR (a) and Power/FPR (b) in the  
 665 second simulation additive genetic effects controlled by 100 causal loci with three phenotypic heritabilities  
 666 0.25(left), 0.5(middle) and 0.75(right), including ISR, FarmCPU, GEMMA, MLM, CMLM,  
 667 FASTmrEMMA, and LM methods. The casual loci were randomly sampled from all the SNPs in each dataset.  
 668 Power was examined under different levels of FDR and FPR. A causal SNP was considered to be detected if  
 669 an SNP within 50 kb on either side was determined to have a significant association (results for other window  
 670 sizes are given in Supplementary Figs.1-2), otherwise, is considered a false positive. The performance of  
 671 detecting associations is measured by the area under the curve (AUC), where a higher value indicates better  
 672 performance.

673

674

675

676

677

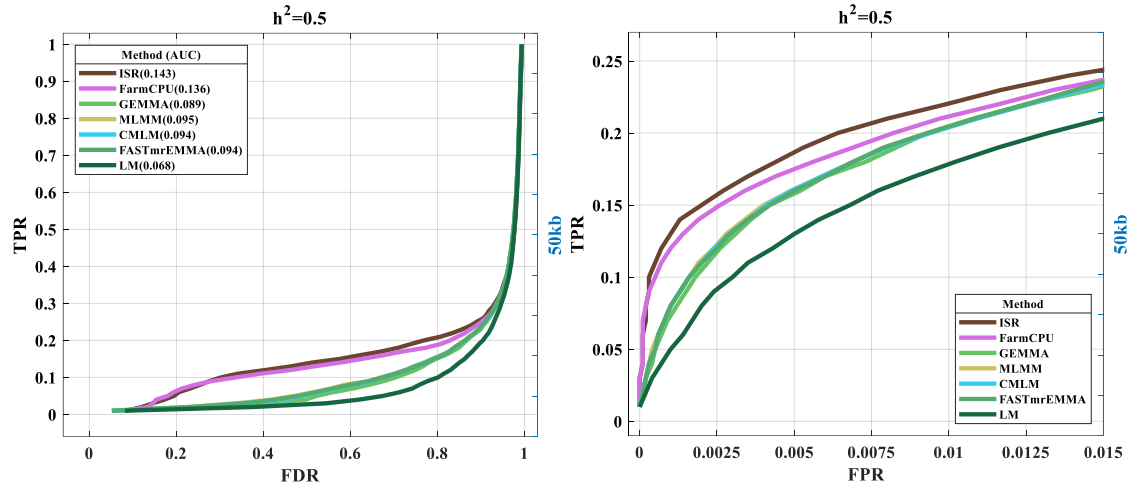

678

679 **Fig.4 Performances of TPR (Power) versus FDR and FPR in full CFW mice genome dataset.** The fourth  
680 simulation additive genetic effects are controlled by 100 causal loci with a phenotypic heritability 0.5. Here,  
681 a causal SNP was considered to be detected if an SNP within 50 kb on either side was determined to have a  
682 significant association, otherwise, is considered a false positive. The Area Under the Curves (AUC) is also  
683 displayed separately for TPR (power) versus FDR. The performance of detecting associations is measured  
684 by the area under the curve (AUC), where a higher value indicates better performance.

685

686

687

688

689

690

691

692

693

694

695

696

697

698

699

700

701

702

703

704

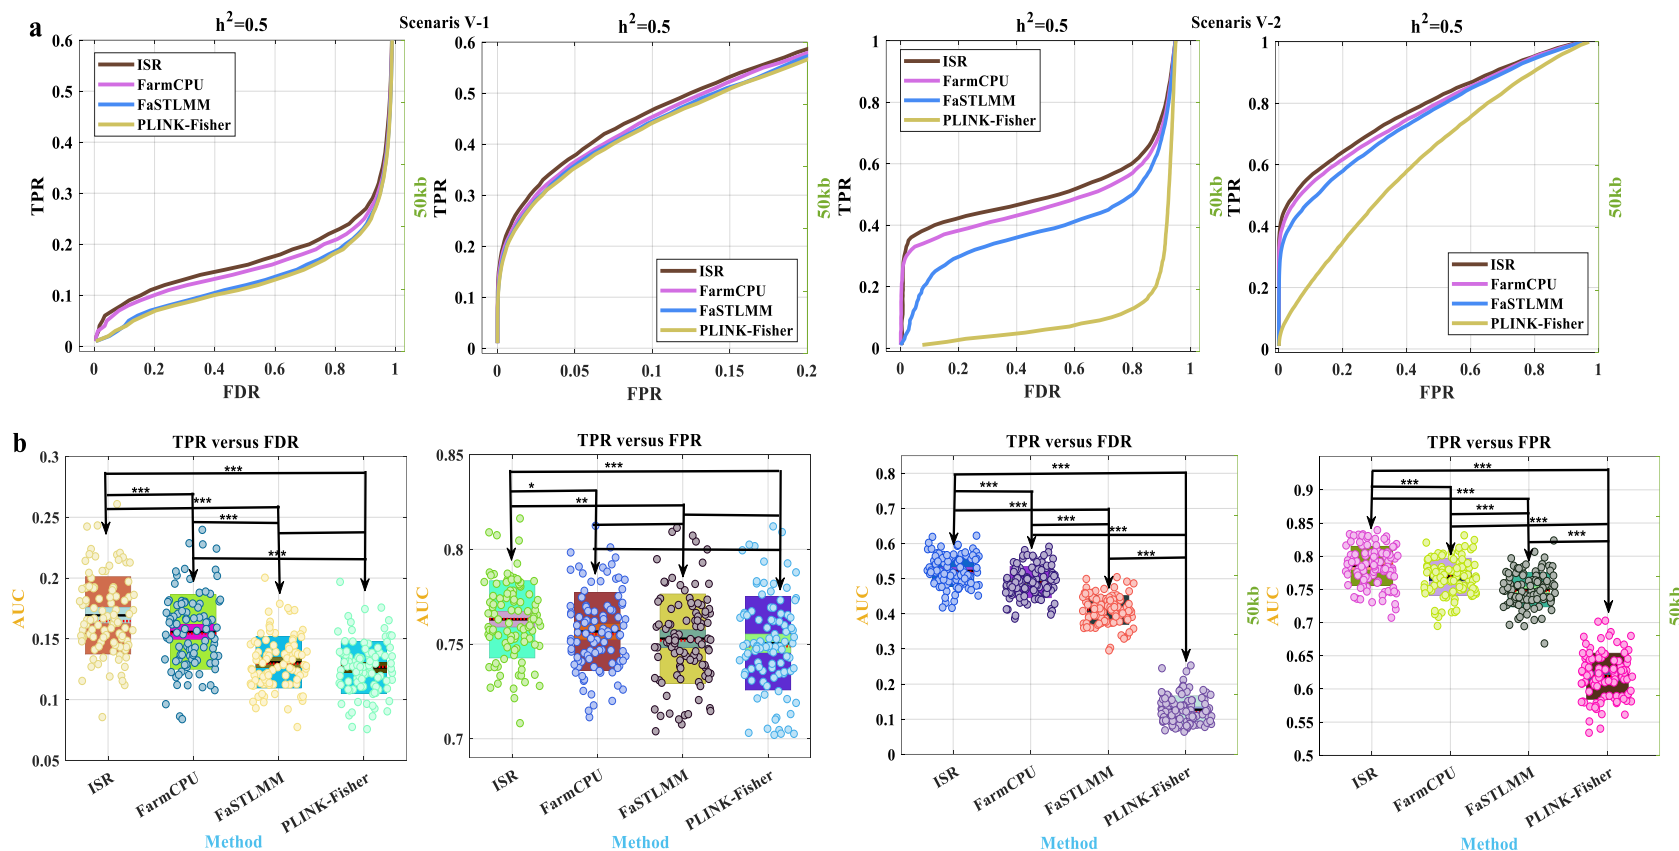

705

706

707 **Fig.5 Statistical power and area under the curve to detect causal loci in the fifth simulation scenarios.** Statistical power was defined as the proportion of  
708 simulated markers detected at cost defined by either False Discovery Rate (FDR) or False Positive Rate (FPR, Type I error). (a) The two types of Receiver Operating  
709 Characteristic (ROC) curves are displayed separately for TPR (true positive rate, power) versus FDR and FPR (the two simulations of Scenarios V (1 -2)). (b) The  
710 Area Under the Curves (AUC) are also displayed separately for TPR (true positive rate, power) versus FDR and FPR for 100 simulations. Four GWAS methods  
711 (ISR, FarmCPU, FaSTLMM, and PLINK-Fisher) were compared with phenotypes simulated from real genotypes in humans. The simulated phenotypes had a  
712 heritability of 50%, controlled by 100 SNPs. These markers were randomly sampled from the available 100000 (88025) Single Nucleotide Polymorphism (SNPs).  
713 (b) .To specify the multiple comparison procedures using Least Significant Difference (LSD) after ANOVA. Here, ‘\*’ represents a significant level of 0.05; ‘\*\*’  
714 represents a significant level of 0.01; ‘\*\*\*’ represents a significant level of 0.001.

715

716

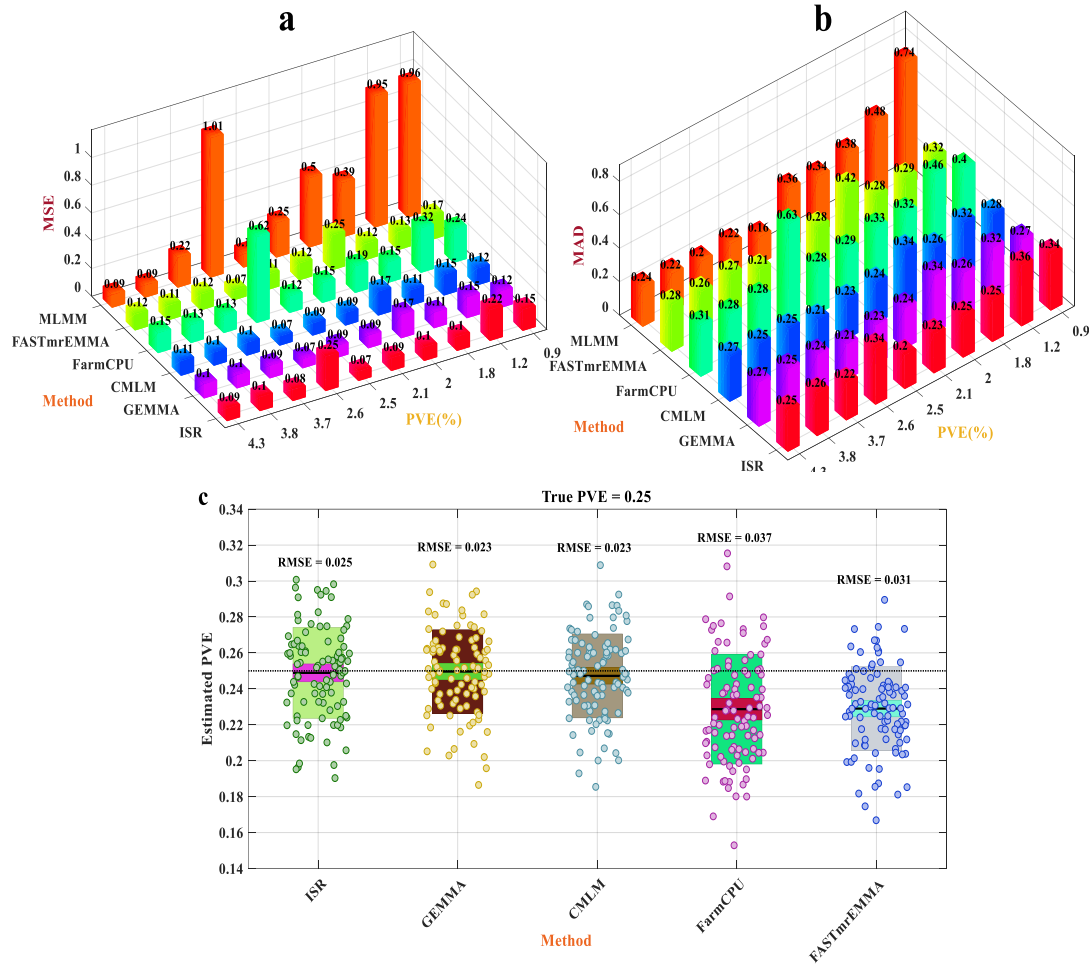

717

718 **Fig.6 Comparison of accuracy for estimated SNPs effect (and PVE) ISR with other six methods.** To  
 719 measure the bias of fixed ten casual SNPs effect estimate, where MSE (**a**) and MAD (**b**) were used to compare  
 720 that in ten different PVE (%). A method with a small MSE (or MAD) is preferable to a method with a large  
 721 MSE (or MAD)<sup>44</sup>. (**c**) as described<sup>71</sup>, which boxplot showed the small middle patch with a 95% confidence  
 722 interval (a range of values you can be 95% confident contains the true mean) for the mean (solid middle line),  
 723 and the large patch was the SD (standard deviation, where the average difference between the data points and  
 724 their mean). The data points with 100 replicates. Performance of estimating PVE is measured by the root of  
 725 mean square error (RMSE), where a lower value indicates better performance. The true PVEs are shown as  
 726 the horizontal dash lines.

727

728

729

730

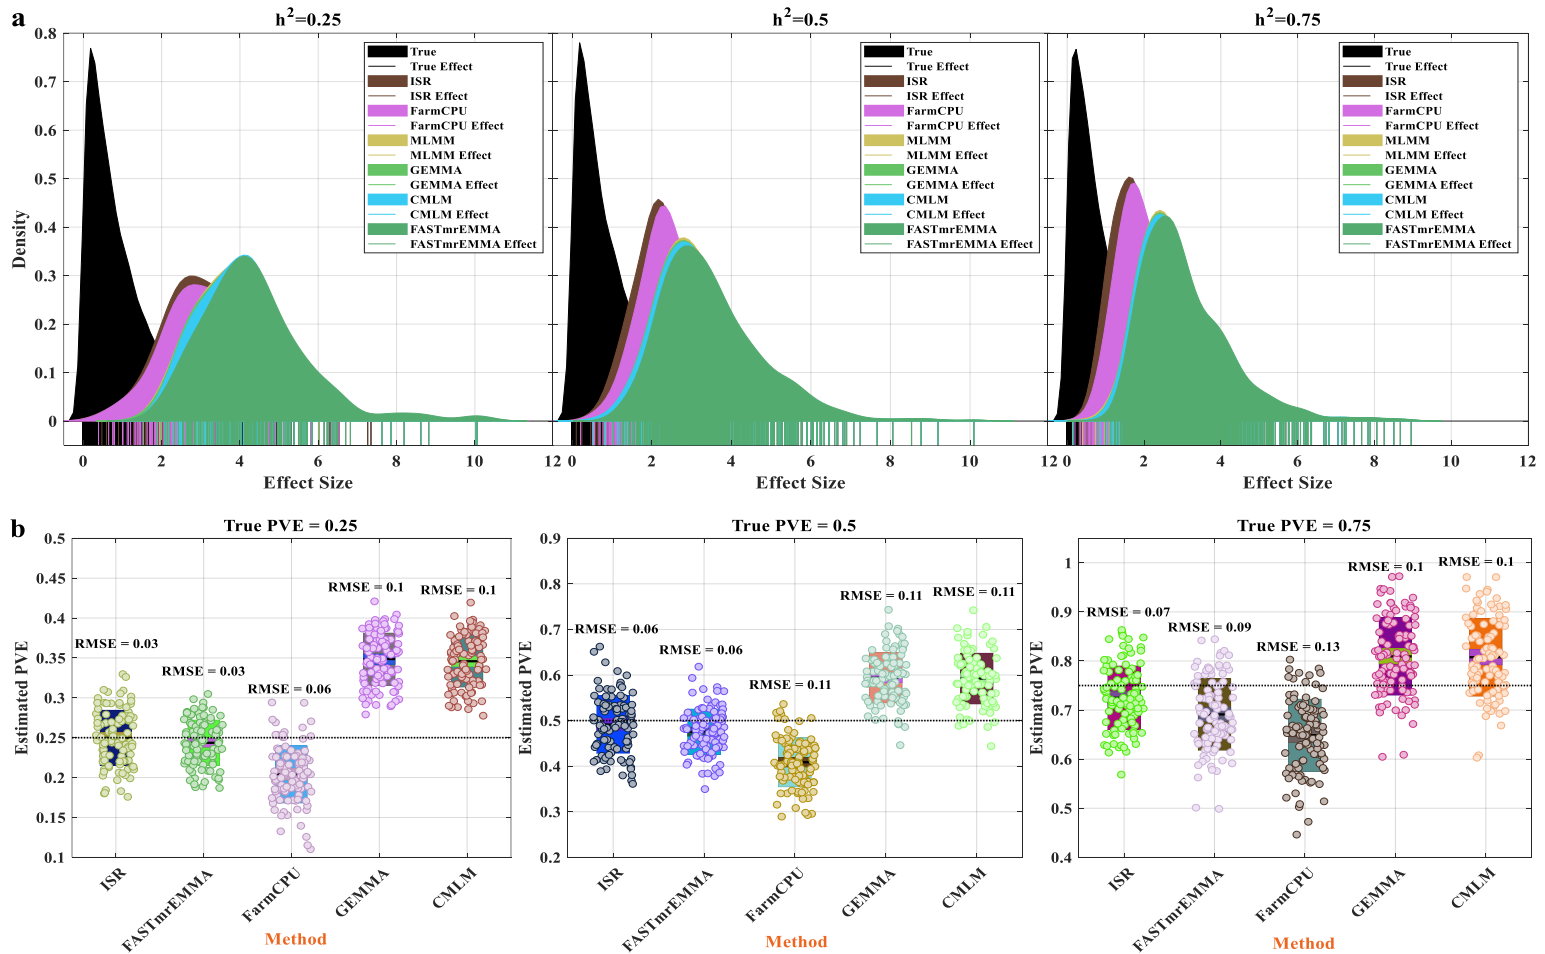

731

732 **Fig.7 Comparison of detected effect and PVE estimates from five methods in the second simulation scenarios.** The distribution of all  
 733 simulated effects (all true effect) and the distribution of effects of loci identified (100 casual loci within 100 simulations, and only true positive)  
 734 by six methods. The solid line shows the effect size by different methods. (a) The phenotype with 25%, 50%, and 75% of PVE from left to right,  
 735 respectively; (b)The bottom boxplot has explained the variance of the loci effect estimated by ISR, FASTmrEMMA, FarmCPU, GEMMA, and  
 736 CMLM within the 100 simulations. Performance of estimating PVE is measured by the root of mean square error (RMSE), where a lower value  
 737 indicates better performance. The true PVEs are shown as the horizontal dash lines.

738

739



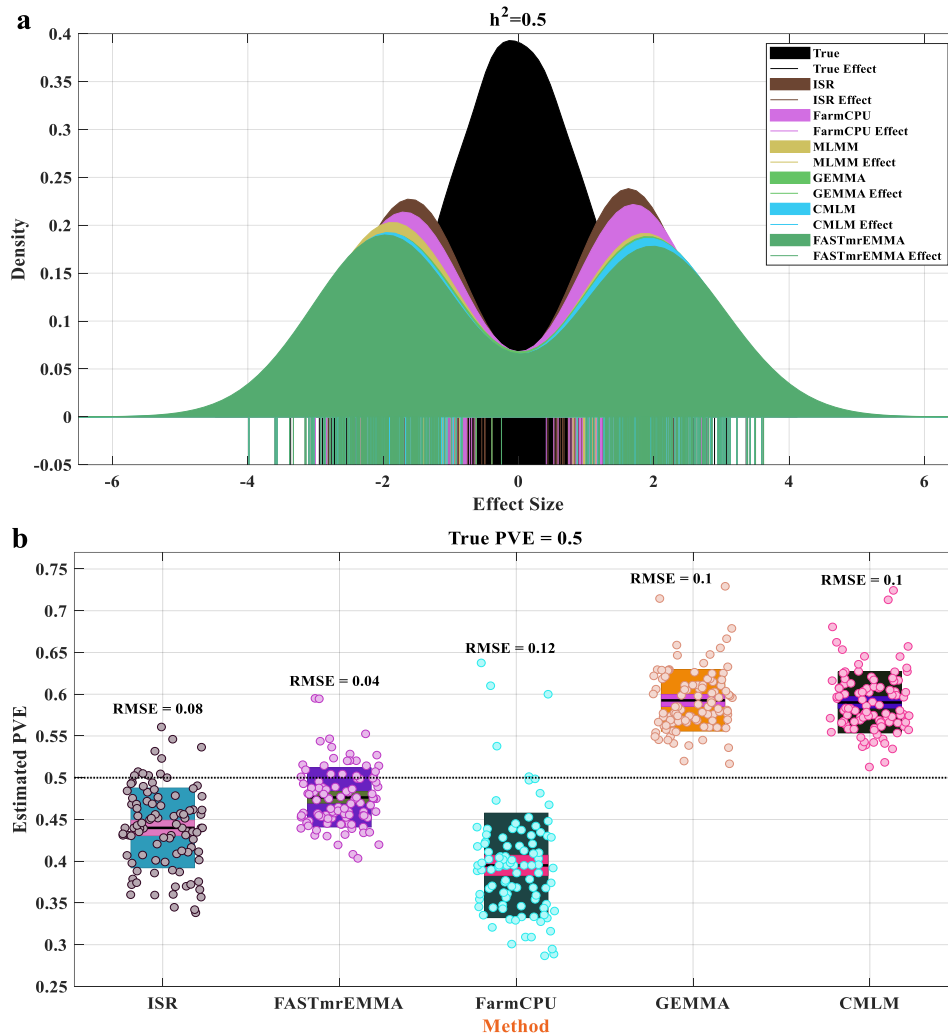

740 **Fig.8 Comparison of detected effect and PVE estimates from five methods in the fourth simulation**  
 741 **scenarios. (a)** The distribution of all simulated effects (all true effect) and the distribution of effects of loci  
 742 identified (100 casual loci within 100 simulations, and only true positive) by six methods. **(b)** The solid line  
 743 shows the effect size by different methods and the phenotype with 50% of PVE. The bottom boxplot has  
 744 explained the variance of the loci effect estimated by ISR, FASTmrEMMA, FarmCPU, GEMMA, and  
 745 CMLM within the 100 simulations. Performance of estimating PVE is measured by the root of mean square  
 746 error (RMSE), where a lower value indicates better performance. The true PVEs are shown as the horizontal  
 747 dash lines.  
 748

749

750

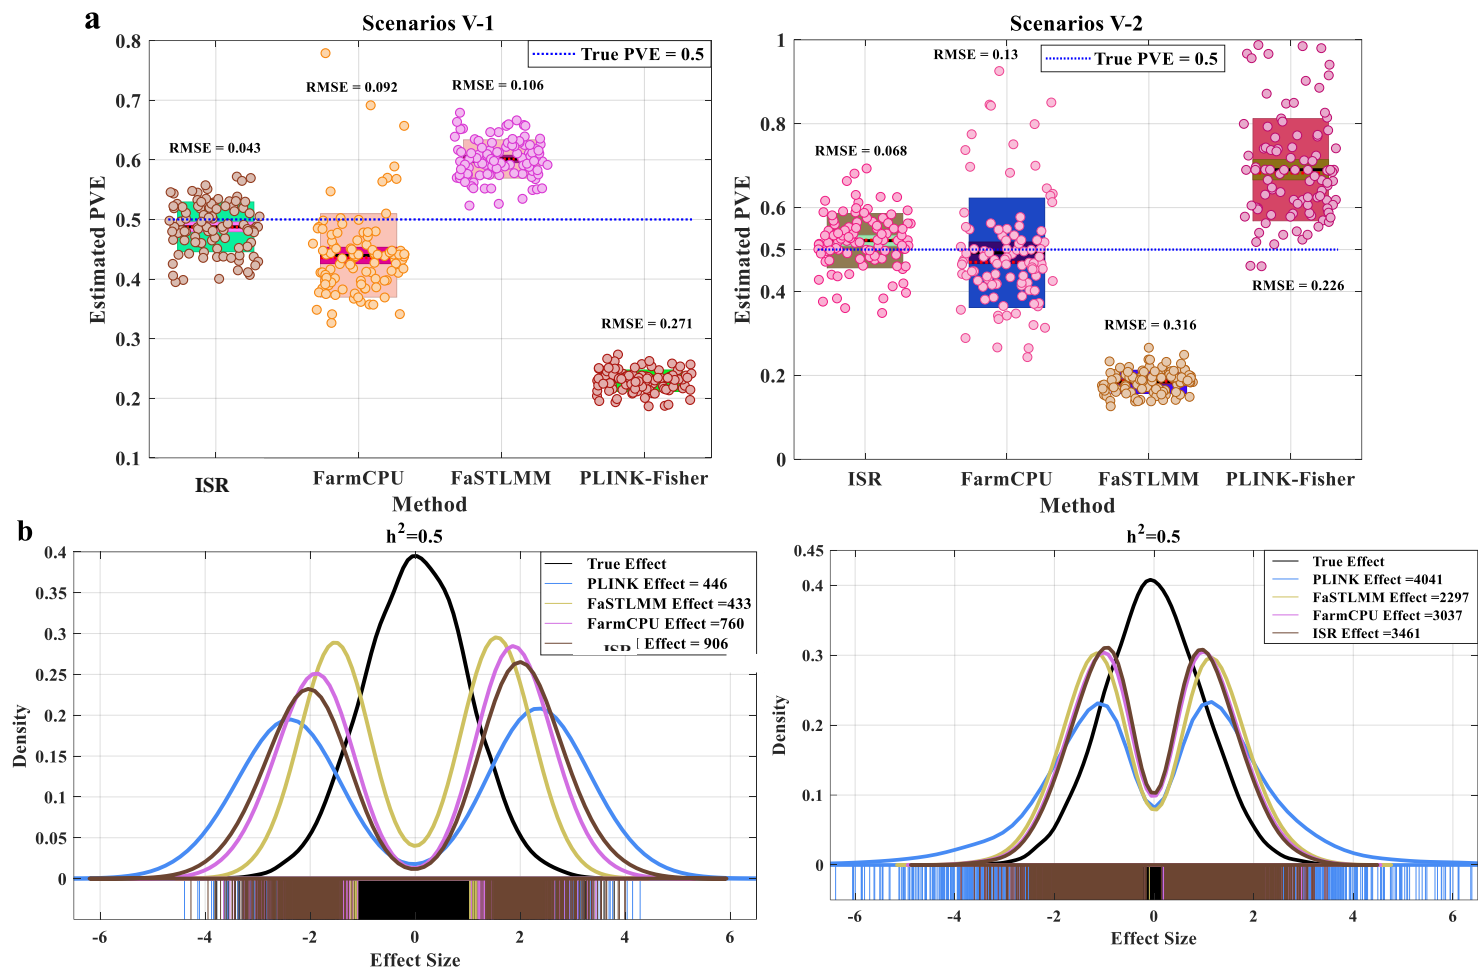

751

752 **Fig.9 Analysis of the results of GWAS simulations using human dataset. a** The explained variance of the casual loci effects estimated by ISR, FarmCPU,  
 753 FaSTLMM, and PLINK-Fisher within the 100 simulations (The two simulations of Scenarios V (1-2)). **b** The distribution of all simulated effects (True Effect,  
 754 black line) and the distribution of effects of loci identified (after 0.05 Bonferroni correction) by ISR (906 loci and 3461 loci), FarmCPU (760 loci and 3037  
 755 loci), FaSTLMM (433 loci and 2297 loci) and PLINK-Fisher (446 loci and 4041), respectively (The two simulations of Scenarios V (1-2)).

756

757

758 Table 1 Comparison of six different methods the associations close to known candidate genes in Arabidopsis  
759 thaliana data

| Phenotype | ISR   | FarmCPU | GEMMA | CMLM | MLMM(EBIC&mBonf) | FASTmrEMMA |
|-----------|-------|---------|-------|------|------------------|------------|
| LD        | 13/20 | 6/9     | 9/11  | 1/1  | 0/0              | 5/6        |
| LDV       | 9/18  | 5/5     | 3/5   | 0/1  | 0/0              | 6/10       |
| SDV       | 15/22 | 4/7     | 3/6   | 0/1  | 0/0              | 2/6        |
| SD        | 15/21 | 6/7     | 1/1   | 0/0  | 0/0              | 1/3        |
| FLC       | 16/23 | 0/2     | 1/3   | 0/0  | 0/0              | 3/5        |
| FRI       | 9/15  | 1/3     | 2/9   | 1/4  | 0/1              | 5/8        |
| FT10      | 15/21 | 4/9     | 4/5   | 0/0  | 0/2              | 1/4        |
| FT16      | 7/14  | 1/2     | 1/2   | 1/1  | 1/1              | 4/8        |
| FT22      | 13/22 | 6/8     | 3/3   | 0/0  | 0/0              | 2/6        |
| FTGH      | 12/21 | 2/6     | 13/17 | 0/0  | 0/0              | 2/3        |
| LN10      | 13/13 | 5/5     | 0/0   | 0/0  | 3/3              | 5/9        |
| LN16      | 14/22 | 5/7     | 2/2   | 0/0  | 2/2              | 6/10       |
| LN22      | 16/22 | 6/8     | 0/0   | 1/1  | 0/0              | 8/12       |
| 8WGHLN    | 7/14  | 3/3     | 0/0   | 0/0  | 2/2              | 4/9        |
| At1CFU2   | 14/17 | 0/0     | 0/0   | 0/0  | 1/1              | 8/12       |
| RPGH      | 12/19 | 0/0     | 0/0   | 0/0  | 0/0              | 7/12       |

760 The table lists the number of true positives/positives (TP/P) detected (passing the genome-wide significance  
761 threshold via Bonferroni correction) by six different methods for all phenotypes related to flowering time in  
762 Arabidopsis thaliana and others (Defense-related, Ionomics, and Developmental phenotypes). Pare all causal  
763 SNPs, and TP is all causal SNPs that are known candidate genes. All reported candidate genes and the  
764 reference literature could be sought on the website (<https://www.arabidopsis.org/index.jsp>). For each trait,  
765 we colored the best method with red and the second-best method with blue.

766

767

768

769

770

771

772

773

774

775
